# Supplementary material for: Rediscovering the rete ovarii, a secreting auxiliary structure to the ovary
Source: eLife. 2025 Mar 19;13:RP96662. doi: 10.7554/eLife.96662 (PMC11922502; doi:10.7554/eLife.96662)
Supplement: Supplementary file 1. [file elife-96662-supp1.xlsx]

## Sheet: Sheet1
Gene Name	Sequence 5' to 3'
mTmG (Mutant Reverse)	AAT CCA TCT TGT TCA ATG GCC GAT C
mTmG (Wildtype Forward)	GGC TTA AAG GCT AAC CTG ATG TG
mTmG (Mutant Forward)	CCG GAT TGA TGG TAG TGG TC
mTmG (Wildtype Reverse)	GGA GCG GGA GAA ATG GAT ATG
Tre-Cre (Forward)	GCG GTC TGG CAG TAA AAA CTA TC
Tre-Cre (Reverse)	GTG AAA CAG CAT TGC TGT CAC TT
Pax8-rtTa (Forward)	CCA TGT CTA GAC TGG ACA AGA
Pax8-rtTa (Reverse)	CTC CAG GCC ACA TAT GAT TAG
Tre-H2B-GFP (Forward)	GCT CGT TTA GTG AAC CGT CAG
Tre-H2B-GFP (Reverse)	TCT TCT GCG CCT TAG TCA CC
Wnt1-Cre (Forward)	CAG CGC CGC AAC TAT AAG AG
Wnt1-Cre (Reverse)	CAT CGA CCG GTA ATG CAG
RTM (WildtypeForward)	AAG GGA GCT GCA GTG GAG TA
RTM (Wildtype Reverse)	CCG AAA ATC TGT GGG AAG TC
RTM (Mutant Forward)	CTG TTC CTG TAC GGC ATG G
RTM (Mutant Reverse)	GGC ATT AAA GCA GCG TAT CC
ESR1 (Mutant Forward)	ATC CCA TGT GCT TGA GTG GT
ESR1 (Common)	CCA CTT CTC CTG GGA GTC TG
ESR1 (Wildtype Forward)	CTG CCA AGG AGA CTC GCT AC
